# Supplementary material
Source: Springer Nature journal article supplement (https://www.springermedizin.de/resource/supplementary/13075_2010_2977_MOESM1_ESM.pdf/9693478)
Supplement: MOESM1 [file 9693478]

ICAMP confusing,  
developed  
laminated response  
pages for scale  
questions

Implemented  
HAQ cards

Deleted  
redundant  
question

Added and tested  
Spanish translations

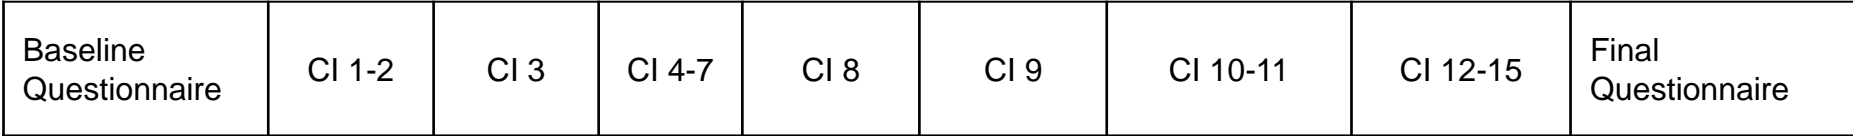

Suggestion  
for increased  
cultural  
sensitivity

Changed CAM  
wording  
"medicinas  
caseras."
